# Supplementary material for: Systematic review of the relationship of Helicobacter pylori infection with geographical latitude, average annual temperature and average daily sunshine
Source: PubMed Central journal article supplement (PMC5905136; doi:10.1186/s12876-018-0779-x), 2018-04-17

## Meta-analysis of analyzing the influences of age, sex, smoking and education on the *H. pylori* infection rate.

### Age

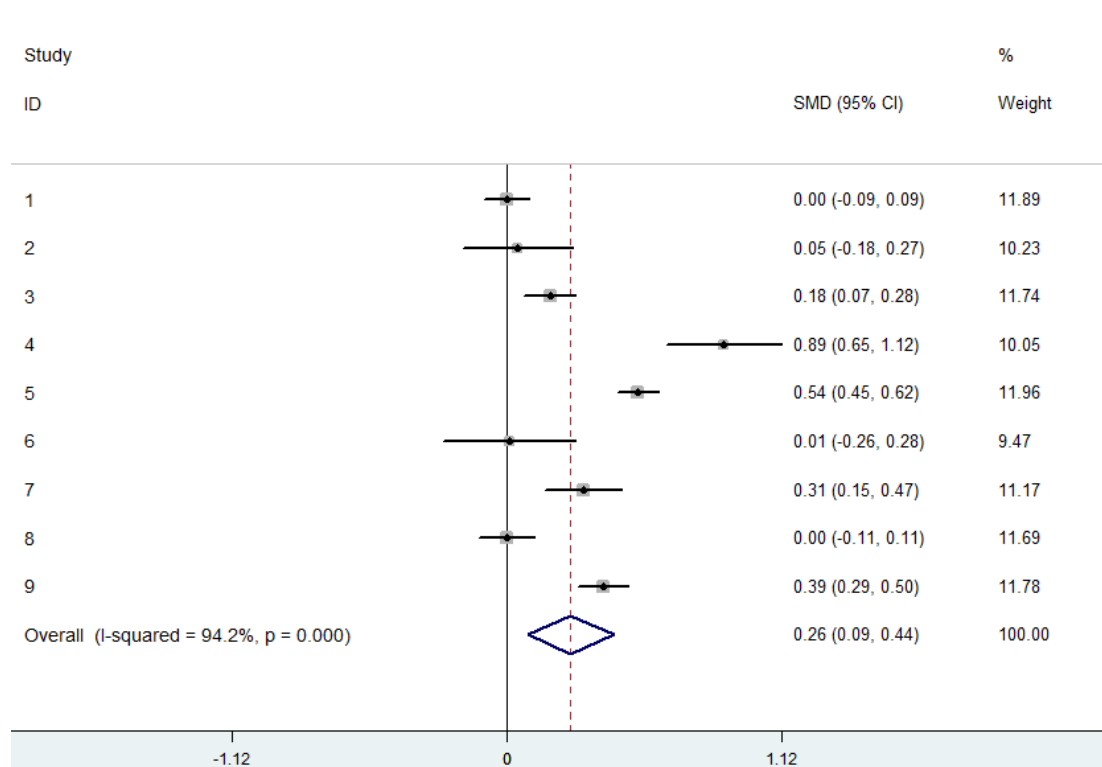

### Education

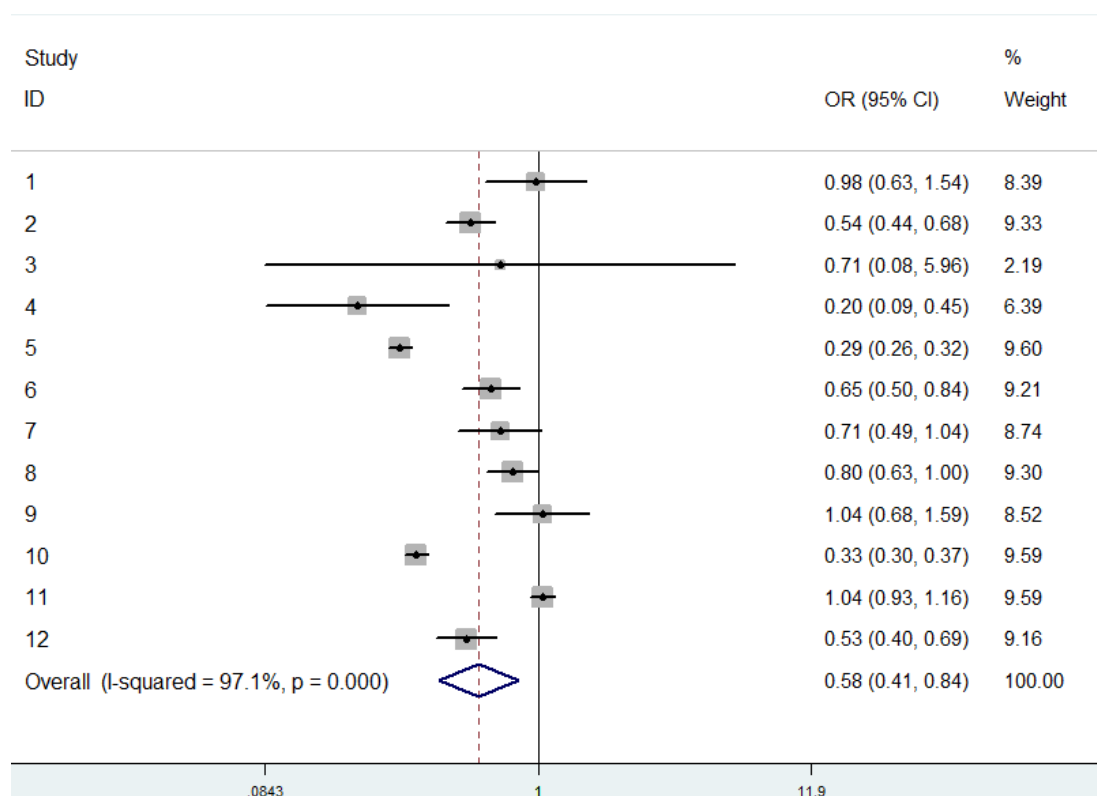



## Gender

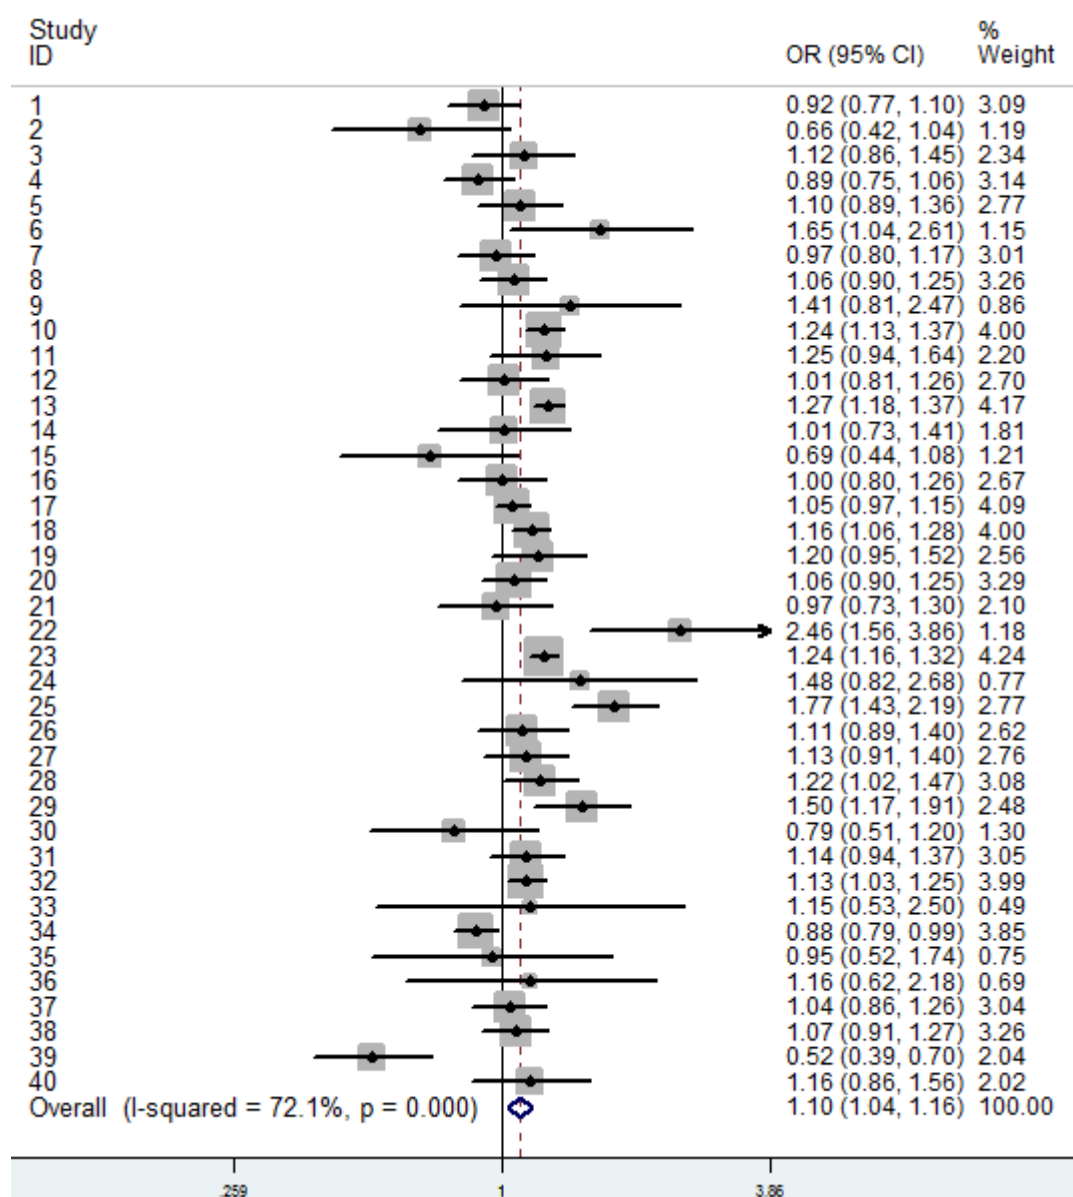

Supplement: 12876_2018_779_MOESM1_ESM.pdf [file 12876_2018_779_MOESM1_ESM.pdf]
